# Supplementary material
Source: PubMed Central journal article supplement (PMC4520818)
Supplement: supp_WNL.0000000000001747_Supplemental_data.pdf [file supp_WNL.0000000000001747_Supplemental_data.pdf]

**Table e-1 Summary of clinical features in the pedigree**

| <b>Individual</b>                        | <b>II-2</b>                         | <b>II-3</b>                         |
|------------------------------------------|-------------------------------------|-------------------------------------|
| Sex/age (years)                          | M/8                                 | F/6                                 |
| Age at onset (years)                     | 1                                   | 1                                   |
| First symptoms                           | Lower limb muscle weakness          | Lower limb muscle weakness          |
| Muscle weakness <sup>a</sup>             |                                     |                                     |
| Upper limb, proximal                     | +                                   | +                                   |
| Upper limb, distal                       | +                                   | ++                                  |
| Lower limb, proximal                     | +                                   | +                                   |
| Lower limb, distal                       | ++                                  | ++                                  |
| Muscle atrophy <sup>b</sup>              |                                     |                                     |
| Upper limb, proximal                     | +                                   | +                                   |
| Upper limb, distal                       | ++                                  | +                                   |
| Lower limb, proximal                     | +                                   | +                                   |
| Lower limb, distal                       | ++                                  | ++                                  |
| Sensory loss <sup>c</sup>                |                                     |                                     |
| Upper limb                               | ++                                  | +                                   |
| Lower limb                               | ++                                  | ++                                  |
| Deep tendon reflexes <sup>d</sup>        | Abs                                 | Abs                                 |
| Foot deformity <sup>e</sup>              | +                                   | +                                   |
| Spine deformity <sup>e</sup>             | +                                   | +                                   |
| General stage of disability <sup>f</sup> | Abnormal walking only with crutches | Abnormal walking only with crutches |

<sup>a</sup>— = no weakness; + = 4/5 on MRC scale; ++ = <4/5 on MRC scale; +++ = complete paralysis.

<sup>b</sup>— = not affected; + = mild atrophy; ++ = moderate atrophy; +++ = severe atrophy.

<sup>c</sup>— = normal; + = reduced below wrist/ankle; ++ = reduced below knee/elbow; +++ = reduced at or above elbow/knee.

<sup>d</sup> N = normal/present; ++ = brisk; +++ = brisk with extensor plantars; +/- = present with reinforcement; Abs = absent.

<sup>e</sup>— = none; + = mild; ++ = severe; +++ = surgery required.

**Table e-2 Electrophysiological features of patients**

| <b>Patients</b>         | <b>II-2</b> | <b>II-3</b> | <b>Normal values</b> |
|-------------------------|-------------|-------------|----------------------|
| Age at exam<br>(years)  | 7           | 6           |                      |
| Motor nerves            |             |             |                      |
| Median nerve            |             |             |                      |
| TL (ms)                 | 3.3         | 5.1         | <4.2                 |
| CMAP (mV)               | 0.4         | 0.7         | >5                   |
| MNCV (m/s)              | 29          | 21          | >45                  |
| Ulnar nerve             |             |             |                      |
| TL (ms)                 | 3.3         | 3.2         | <3                   |
| CMAP (mV)               | 0.6         | 0.4         | >5                   |
| MNCV (m/s)              | 24          | 26          | >45                  |
| Peroneal nerve          |             |             |                      |
| TL (ms)                 | Abs         | 5.4         | <5.5                 |
| CMAP (mV)               | Abs         | 0.2         | >3                   |
| MNCV (m/s)              | Abs         | 29          | >40                  |
| Tibial nerve            |             |             |                      |
| TL (ms)                 | Abs         | Abs         | <6.0                 |
| CMAP (mV)               | Abs         | Abs         | >3                   |
| MNCV (m/s)              | Abs         | Abs         | >40                  |
| Sensory nerves          |             |             |                      |
| Median nerve            |             |             |                      |
| SNAP ( $\mu$ V)         | 0.5         | 4           | >3                   |
| SNCV (m/s)              | 33.3        | 29          | >45                  |
| Ulnar nerve             |             |             |                      |
| SNAP ( $\mu$ V)         | 2.2         | 4           | >3                   |
| SNCV (m/s)              | 27.3        | 29          | >44                  |
| Sural nerve             |             |             |                      |
| SNAP ( $\mu$ V)         | Abs         | Abs         | >3                   |
| SNCV (m/s)              | Abs         | Abs         | >40                  |
| Muscle                  |             |             |                      |
| Deltoideus (L/R)        |             |             |                      |
| ASA                     | -/-         | -/-         |                      |
| MUAP (mV)               | 1.0/0.7     | 0.9/1.1     | 0.5-1.6              |
| Opponens pollicis (L/R) |             |             |                      |
| ASA                     | -/+         | +/-         |                      |
| MUAP (mV)               | 0.2/0.1     | 0.1/0.1     | 0.4-2.0              |
| Vastus medialis (L/R)   |             |             |                      |
| ASA                     | -/-         | -/-         |                      |
| MUAP (mV)               | 0.8/0.8     | 1.1/0.7     | 0.6-1.6              |
| Tibialis anterior (L/R) |             |             |                      |

|           |           |           |         |
|-----------|-----------|-----------|---------|
| ASA       | +/+       | +/+       |         |
| MUAP (mV) | Abs / Abs | Abs / Abs | 0.5-1.5 |

Abs, absent; NT, not tested. TL, terminal latency; CMAP, compound muscle action potential; MNCV, motor nerve conduction velocity; SNAP, sensory nerve action potential; SNCV, sensory nerve conduction velocity; L/R, left/right; ASA, abnormal spontaneous activity (fibrillation potential, positive sharp waves or fasciculation potential); MUAP, motor unit action potential; —, not present; +, present;

**Table e-3 Exome data-filtering approach to identify mutations with recessive inheritance patterns in the family**

| Steps | Data filtering                                                 | Candidate variants |
|-------|----------------------------------------------------------------|--------------------|
|       | SNP/Indel Calling                                              | 124969 variants    |
| Step1 | Identify missense, nonsense and splicing variants (SNP+Indel)  | 10993 variants     |
| Step2 | Remove variants found in cg46                                  | 1434 variants      |
| Step3 | Remove variants with SIFT score > 0.05                         | 345 variants       |
| Step4 | Remove variants with PolyPhen2 score(HumanDiv database) < 0.93 | 161 variants       |
| Step5 | Remove variants in the 1000 Genomes Project(ALL) with MAF>0.01 | 128 variants       |
| Step6 | Remove variants in NHLBI-ESP 6500 exomes with MAF>0.01         | 121 variants       |
| Step7 | Compile a list of candidate genes based on diseaes model       | 16 genes           |
| Step8 | Candidate gene links to mendelian disorders                    | IGHMBP2            |

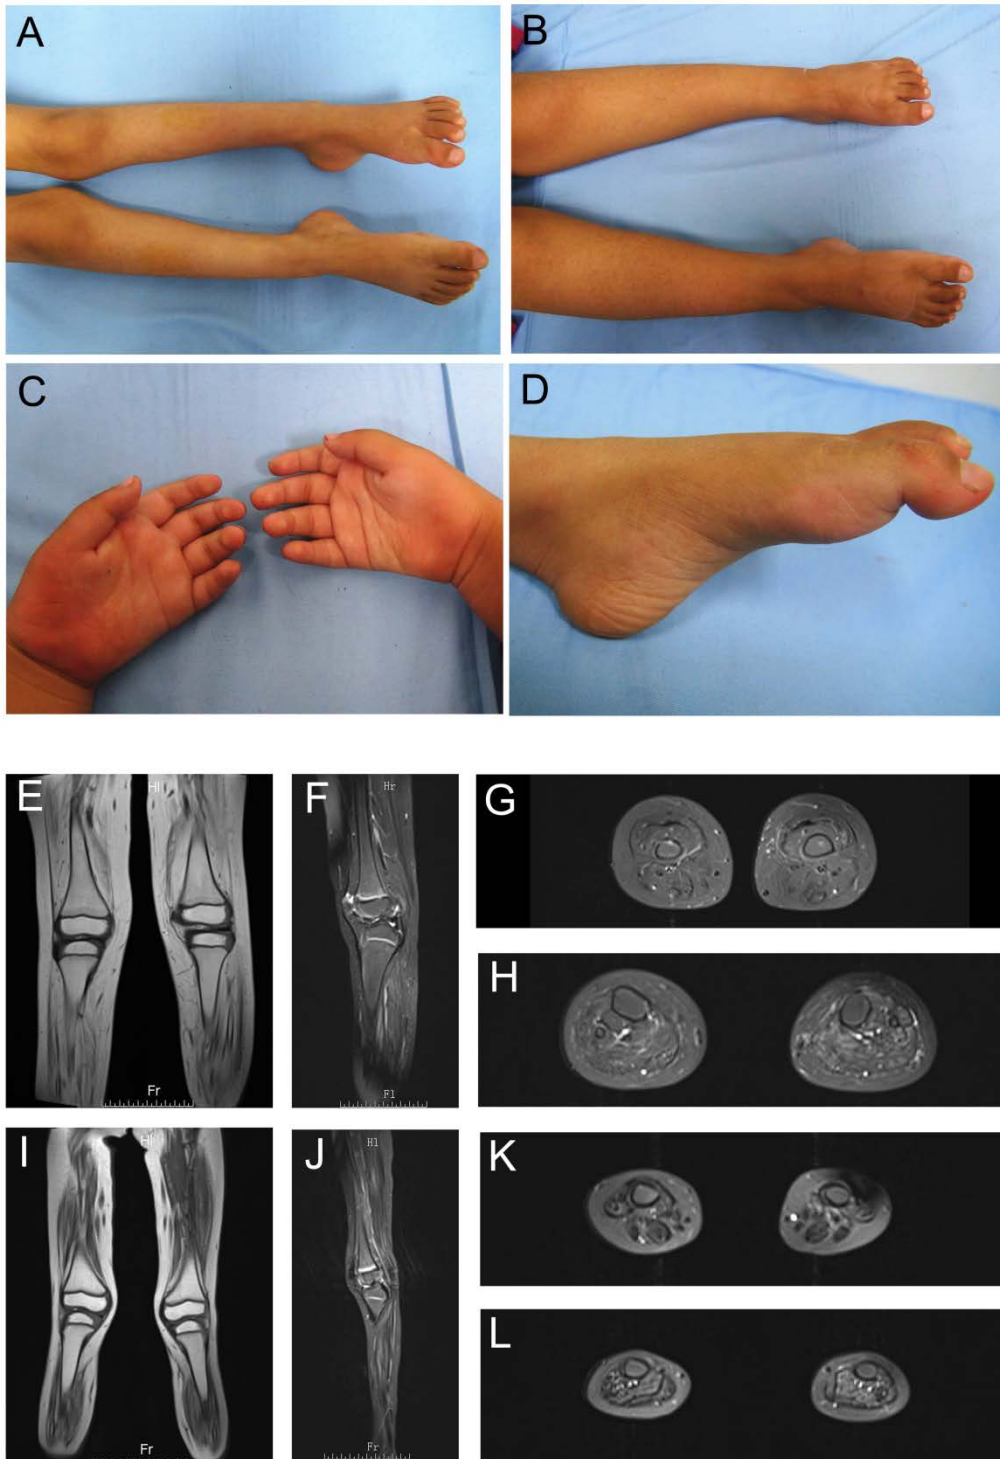

**Figure e-1: Photographs and T1-weighted MRI of the individuals with IGHMBP2 mutations.**

(A and B) Legs and feet of the patients II-3 and II-2, showing wasting in the lower limbs.(C) Involved hands of individual II-2.(D) Foot deformity of individual II-2. (E-L) T1-weighted MRIs of the thigh and lower leg of the patients. MRIs demonstrated severe muscle atrophied and diffuse fatty hyperintense with signal changes and the lower legs were more severe than the thighs. (E~H),

II-2; (I~L), II-3. (E,I), coronal images;(F,J) sagitta images;(G,H,K,L)Axial images(right).

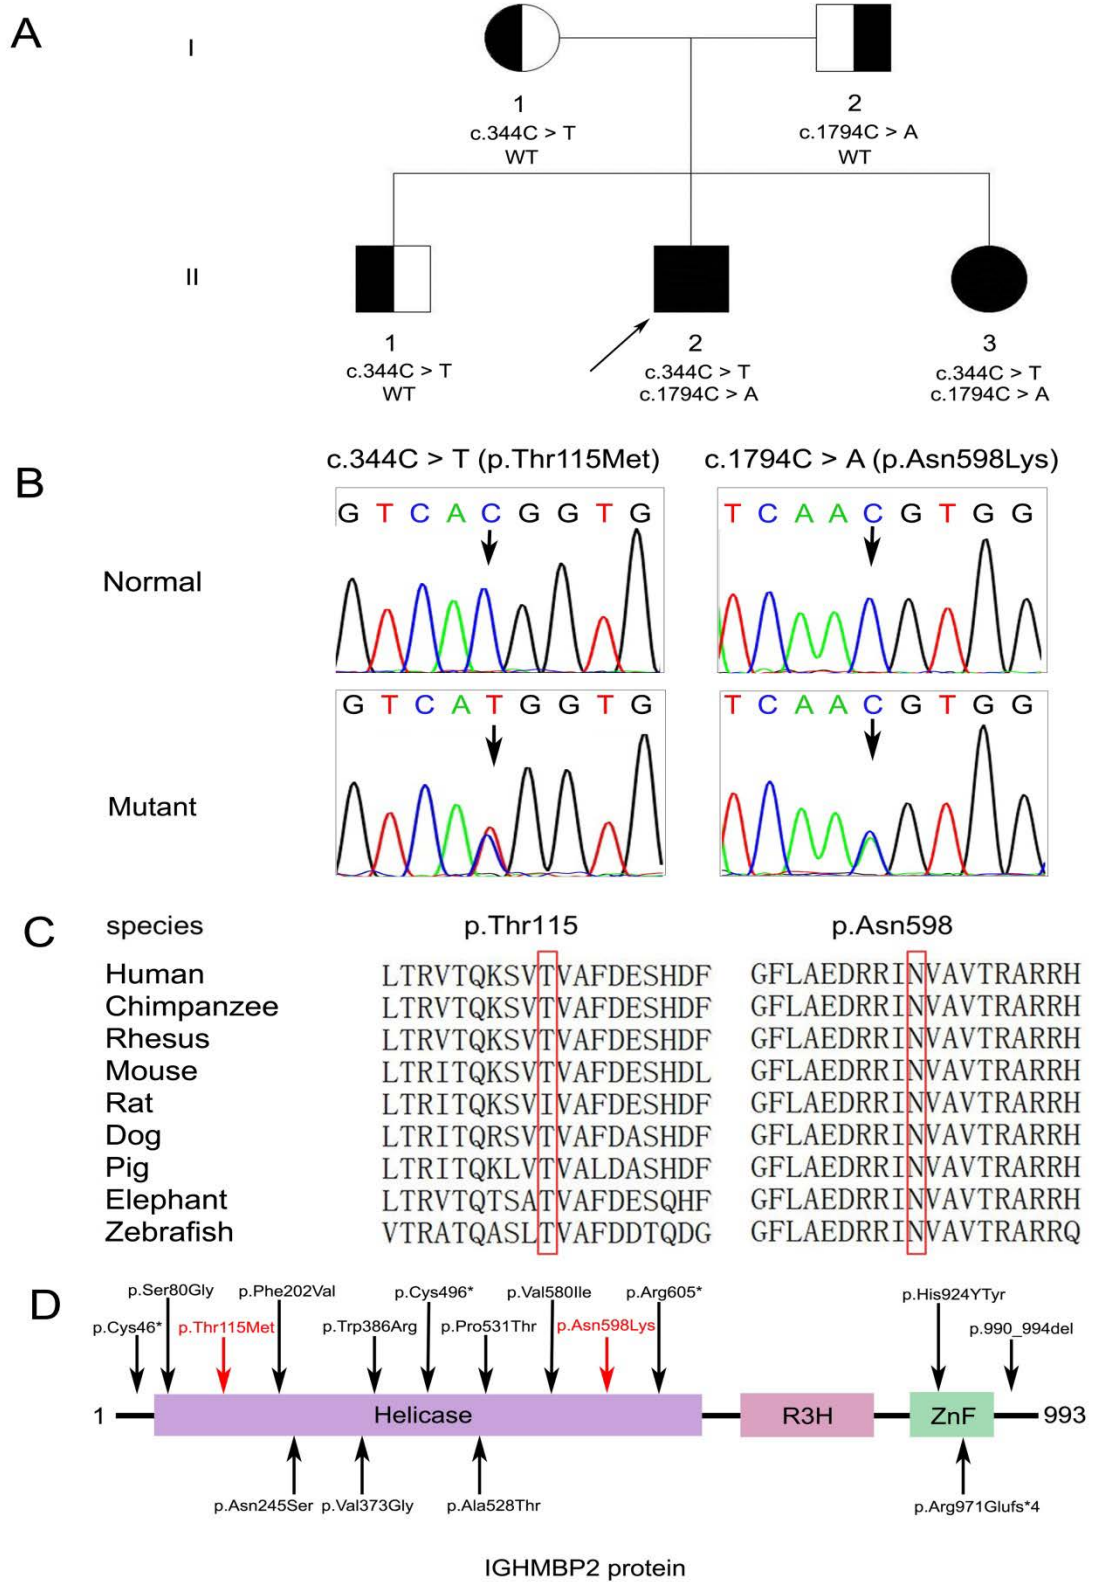

**Figure e-2: Pedigree of the family affected by IGHMBP2 mutations .**

(A) Pedigree. Open symbols, unaffected ; filled symbol, affected; Half-filled symbols, carriers (possessing one mutant allele); arrow, proband. Genotypes of both IGHMBP2 mutations are indicated at below each individual. (B) Sequencing chromatograms. Vertical arrows indicate the mutation site. (C) Conservation analysis of amino acid sequences. The analysis was conducted using clustalx2.1 software. The amino acids p.Asn598 is fully conserved across species while the amino acids p.Thr115 is partial conserved. Red boxes indicate the location of the amino acid changed due to the mutation. (D) Domain structure of the IGHMBP2 protein. The schematic of IGHMBP2 shows the helicase, R3H, and ZnF domains. The positions of the identified mutations related to HMSN are located and mutations of our family are in red.
